# Supplementary material for: A dynamic parameterization of sulfuric acid–dimethylamine nucleation and its application in three-dimensional modeling
Source: Copernicus journal article supplement (doi:10.5194/acp-23-8789-2023), 2023-08-09
Supplement: Supplementary file 1 [file acp-23-8789-2023-supplement.pdf]

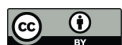

*Supplement of*

## **A dynamic parameterization of sulfuric acid–dimethylamine nucleation and its application in three-dimensional modeling**

**Yuyang Li et al.**

*Correspondence to:* Bin Zhao (bzhao@mail.tsinghua.edu.cn) and Jingkun Jiang (jiangjk@tsinghua.edu.cn)

The copyright of individual parts of the supplement might differ from the article licence.

24 **1** Lookup table for necessary parameters

25 **Table S1. Lookup table for  $G(i,j)$  and  $H(i)$  in the parameterization**

| $G(i,j)$ |   | $i$  |      |      |      |      |      |      | 26 |
|----------|---|------|------|------|------|------|------|------|----|
|          |   | 1    | 2    | 3    | 4    | 5    | 6    | 7    | 27 |
| $j$      | 1 | 0.71 | 0.96 | 0.86 | 0.91 | 1.01 | 1.15 | 1.28 |    |
|          | 2 | 0.96 | 1.20 | 1.20 | 1.31 | 1.47 | 1.70 | 1.90 |    |
|          | 3 | 0.86 | 1.20 | 1.00 | 1.01 | 1.11 | 1.22 | 1.32 |    |
|          | 4 | 0.91 | 1.31 | 1.01 | 0.99 | 1.06 | 1.13 | 1.20 |    |
|          | 5 | 1.01 | 1.47 | 1.11 | 1.06 | 1.12 | 1.18 | 1.24 |    |
|          | 6 | 1.15 | 1.70 | 1.22 | 1.13 | 1.18 | 1.20 | 1.24 |    |
|          | 7 | 1.28 | 1.90 | 1.32 | 1.20 | 1.24 | 1.24 | 1.26 |    |
| $H(i)$   |   | 1.00 | 0.89 | 0.63 | 0.51 | 0.43 | 0.34 | 0.29 |    |

## 28 2 Derivation of the Explicit Formula

29 Based on the kinetic model presented by Cai et al. (Cai et al., 2021), the formula of pseudo-steady-state cluster concentrations  
30 and nucleation rates is as follows:

$$31 \quad [A_1B_1] = [SA_{tot}] - [A], \quad (S1)$$

$$32 \quad [A_1B_1] = \frac{\beta_{1-2}[A][B]}{\beta_{1-3}[A] + \beta_{3-3}[A_1B_1] + \beta_{3-5}[A_2B_2] + \beta_{3-6}[A_3B_3] + \beta_{3-7}[A_4B_4] + CoagS_3 + \gamma}, \quad (S2)$$

$$33 \quad [A_2B_1] = \frac{\beta_{1-3}[A][A_1B_1]}{\beta_{2-4}[B] + CoagS_4}, \quad (S3)$$

$$34 \quad [A_2B_2] = \frac{\frac{1}{2}\beta_{3-3}[A_1B_1][A_1B_1] + \beta_{2-4}[A_2B_1][B]}{\beta_{3-5}[A_1B_1] + \beta_{5-5}[A_2B_2] + CoagS_5}, \quad (S4)$$

$$35 \quad [A_3B_3] = \frac{\beta_{3-5}[A_2B_2][A_1B_1]}{\beta_{3-6}[A_1B_1] + CoagS_6}, \quad (S5)$$

$$36 \quad [A_4B_4] = \frac{\beta_{3-6}[A_3B_3][A_1B_1] + \frac{1}{2}\beta_{5-5}[A_2B_2][A_2B_2]}{\beta_{3-7}[A_1B_1] + CoagS_7}, \quad (S6)$$

$$37 \quad J_{A_4B_4} = \beta_{3-6}[A_3B_3][A_1B_1] + \frac{1}{2}\beta_{5-5}[A_2B_2][A_2B_2], \quad (S7)$$

38 where  $[SA_{tot}]$  represents the concentrations of sulfuric acid (SA) molecules or clusters containing one SA molecule,  $A$  is SA  
39 molecules,  $B$  is dimethylamine (DMA) molecules, and  $A_mB_n$  is the clusters consisting of  $m$  SA molecules and  $n$  DMA  
40 molecules.  $\beta_{i-j}$  ( $m^3 s^{-1}$ ) represents the collision coefficients ( $\beta$ ) between molecules or clusters  $i$  and  $j$ , and 1-7 represent  $A$ ,  $B$ ,  
41  $A_1B_1$ ,  $A_2B_1$ ,  $A_2B_2$ ,  $A_3B_3$ , and  $A_4B_4$ , respectively. Similarly,  $CoagS_i$  represents the coagulation sinks of molecules or clusters  $i$ .  $\gamma$   
42 ( $s^{-1}$ ) is the evaporation rate of  $A_1B_1$  clusters. Here the concentrations of clusters are shown as  $[A_mB_n]$  in  $m^{-3}$ .

43 The analytical solution should be simplified based on proper approximations. For typical polluted urban areas, the sink of  $A_1B_1$   
44 is mainly due to the coagulation scavenging and evaporation, that is,

$$45 \quad [A_1B_1] \approx \frac{\beta_{1-2}[A][B]}{CoagS_3 + \gamma}, \quad (S8)$$

46 however, for a wider range of atmospheric environments with lower CS and temperatures, the above approximations might  
47 lead to an overestimation of SA-DMA nucleation rates. Thus in this study, the self-coagulation of  $A_1B_1$  and coagulation with  
48  $A$  would also be taken into account as a sink of  $A_1B_1$ :

$$49 \quad [A_1B_1] \approx \frac{\beta_{1-2}[A][B]}{\beta_{1-3}[A] + \beta_{3-3}[A_1B_1] + CoagS_3 + \gamma} \approx \frac{\beta_{1-2}[A][B]}{\beta_{1-3}[SA_{tot}] + CoagS_3 + \gamma}, \quad (S9)$$

50 Putting the above assumption together with the pseudo-steady-state nucleation rates formula, the explicit formula could be  
51 simplified to the version in the main text (Eqs. 8-11).

52

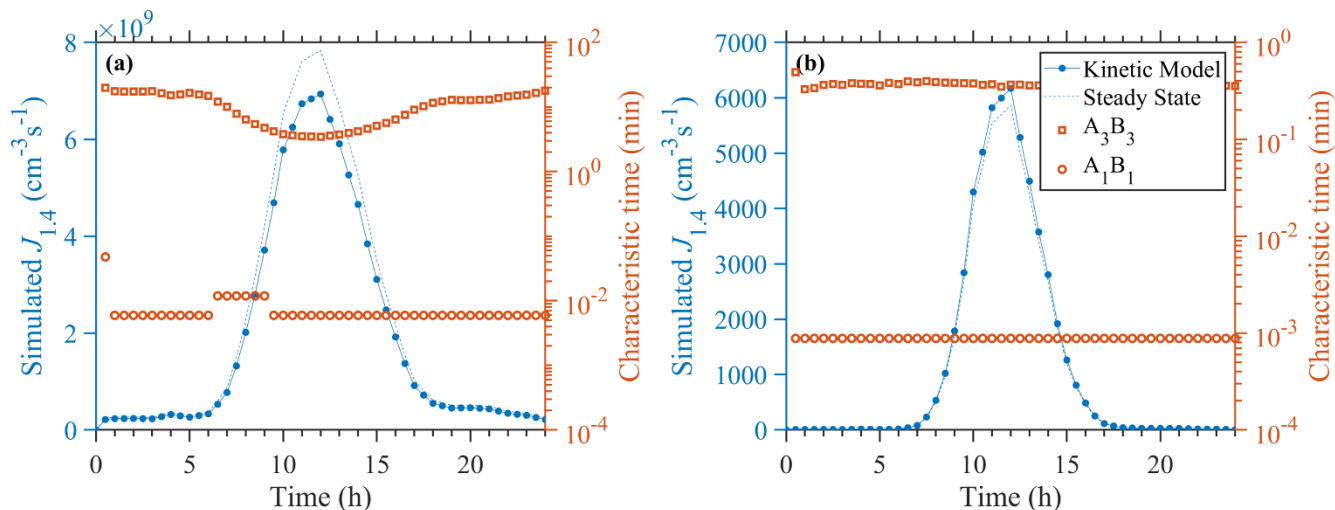

54

55 **Figure S1. Simulated  $J_{1.4}$  (blue) and characteristic equilibrium time (red) of  $A_3B_3$  and  $A_1B_1$ .** The typical conditions are  
 56  $[DMA]=3.0$  pptv with  $CS=0.0001$   $s^{-1}$  and  $T=255$  K in (a) and  $CS=0.01$   $s^{-1}$  and  $T=315$  K in (b). The variation of SA  
 57 concentrations is equal to the averaged diurnal variations.

### 58 3 Dimethylamine Emission inventory for marine area

59 Similar to the continental emission inventory for DMA, the maritime part is also built by combination of  $NH_3$  emission  
 60 inventory and DMA/ $NH_3$  emission ratio. The maritime  $NH_3$  emission is adopted from the results of Paulot et al with a grid  
 61 transformation. The DMA/ $NH_3$  emission ratio is estimated by the measured data from a previous study (Chen et al., 2021).  
 62 During their maritime campaign, mean gaseous DMA and  $NH_3$  concentrations are  $0.006$   $\mu g\ cm^{-3}$  and  $0.5300$   $\mu g\ cm^{-3}$ , of which  
 63 16% and 34% come from continental transport, respectively. Hence we can obtain the marine-originated DMA ( $0.0050$   $\mu g\ cm^{-3}$ )  
 64 and  $NH_3$  ( $0.34980$   $\mu g\ cm^{-3}$ ) concentrations and an approximate DMA/ $NH_3$  emission ratio of 0.0144.

65 **Table S2. Key parameters in simulating atmospheric sinks of dimethylamine**

| Sinks                                                                               | This study             | Variation range                                                                      |
|-------------------------------------------------------------------------------------|------------------------|--------------------------------------------------------------------------------------|
| Wet deposition<br>(Henry Law's constant/mol $m^{-3}$ Pa $^{-1}$ )                   | 0.56                   | 0.3-0.6 (Sander, 2015)                                                               |
| Gas-phase reaction<br>( $\bullet OH$ oxidation rate constant/ $cm^{-3}$ s $^{-1}$ ) | $6.49 \times 10^{-11}$ | $(5.85-7.13) \times 10^{-11}$<br>(Carl and Crowley, 1998)                            |
| Aerosol uptake<br>(Uptake coefficient)                                              | 0.001                  | $5.9 \times 10^{-4}$ - $4.4 \times 10^{-2}$<br>(Qiu et al., 2011; Wang et al., 2010) |

66

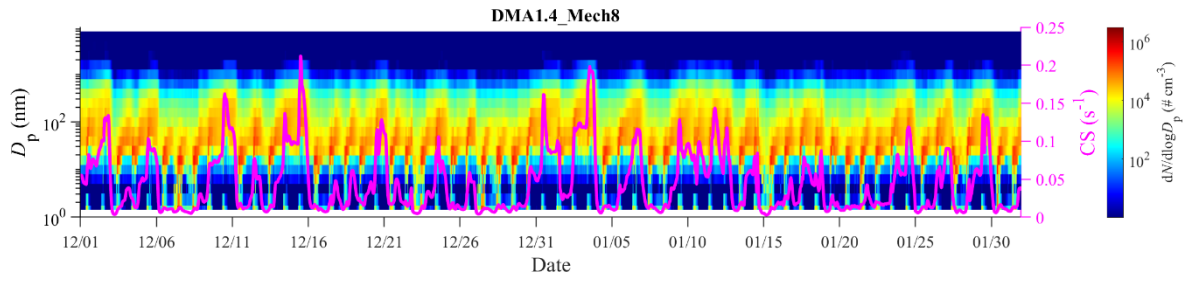

68  
69 **Figure S2. Simulated Evolution of PNSDs and Timeseries of CS (violet line) from scenario DMA1.4\_Mech8.**

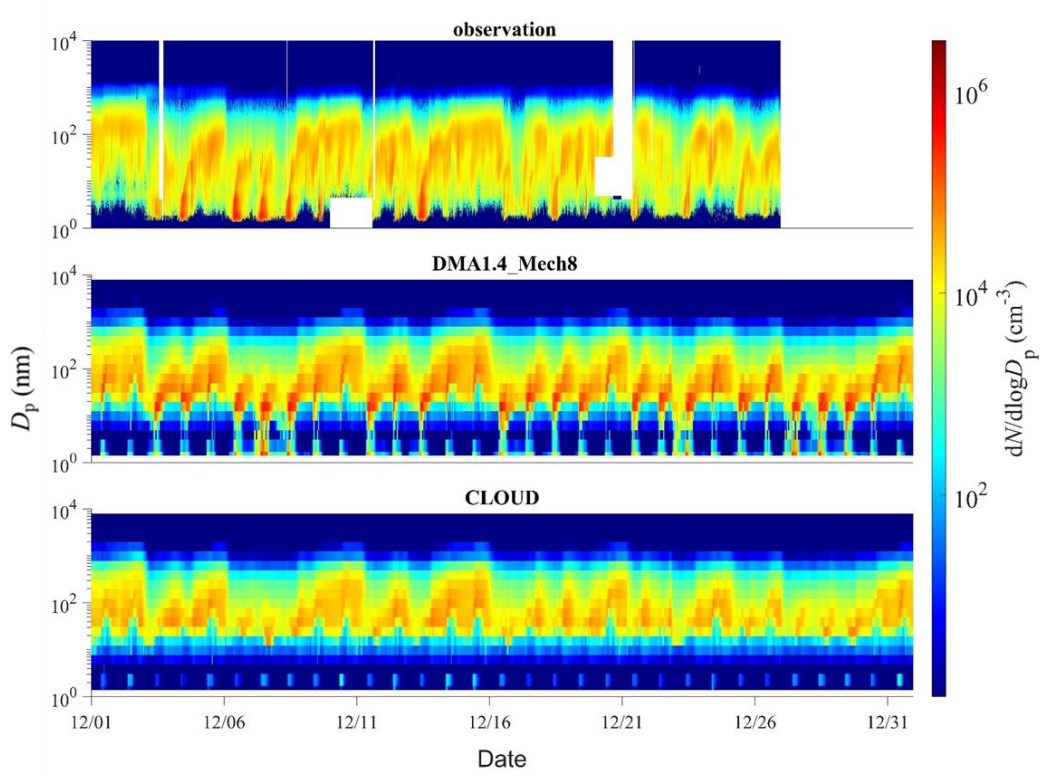

71  
72 **Figure S3. Comparison of observed and simulated averaged particle number size distribution from scenarios with**  
73 **parameterizations from Dunne et al., 2016 (CLOUD) the original scenario (DMA1.4\_Mech8).**

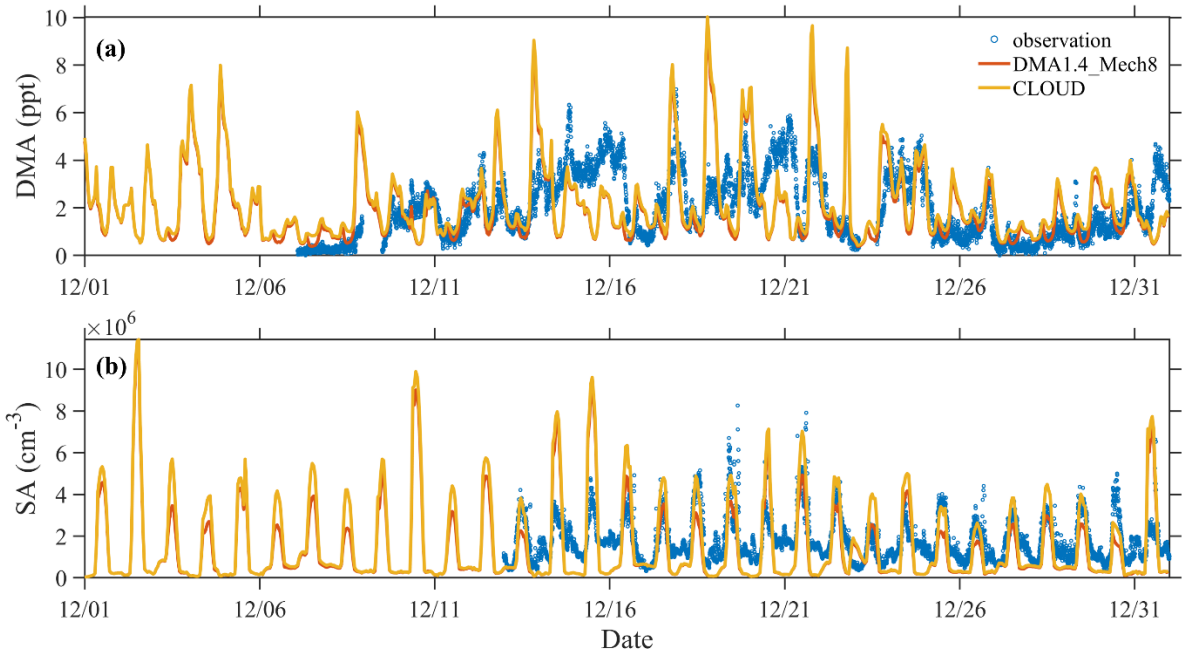

74  
 75 **Figure S4. Comparison of observed and simulated DMA (a) and SA (b) concentrations from scenarios with**  
 76 **parameterizations from Dunne et al., 2016 (CLOUD) the original scenario (DMA1.4\_Mech8).**

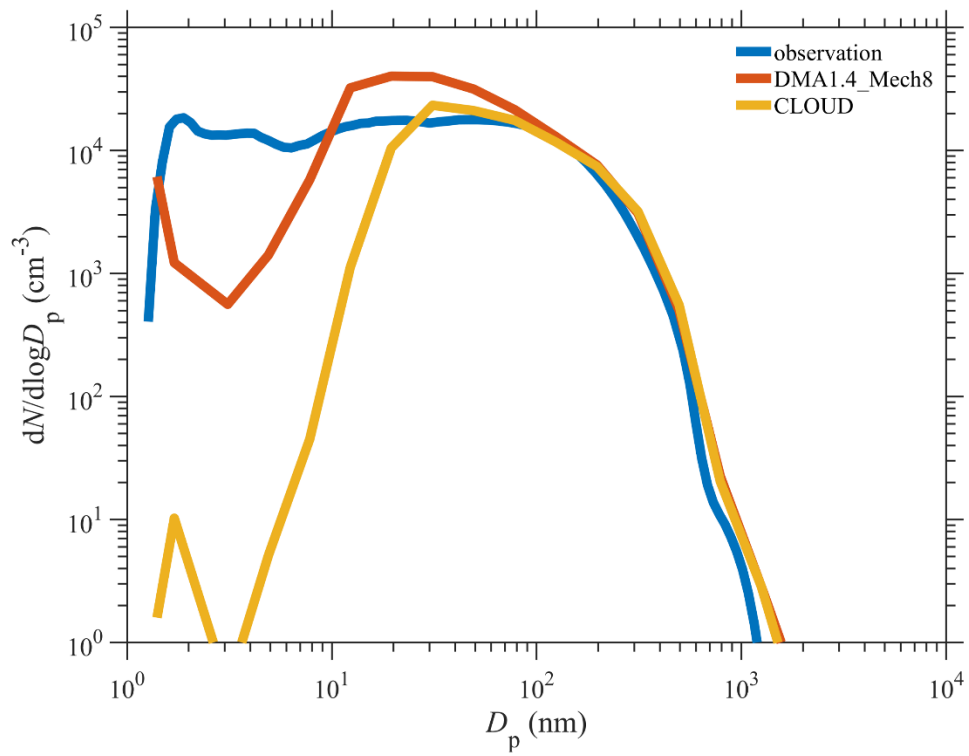

77

78 **Figure S5. Comparison of observed and simulated averaged particle number size distribution from scenarios with**  
 79 **parameterizations from Dunne et al., 2016 (CLOUD) the original scenario (DMA1.4\_Mech8).**

80



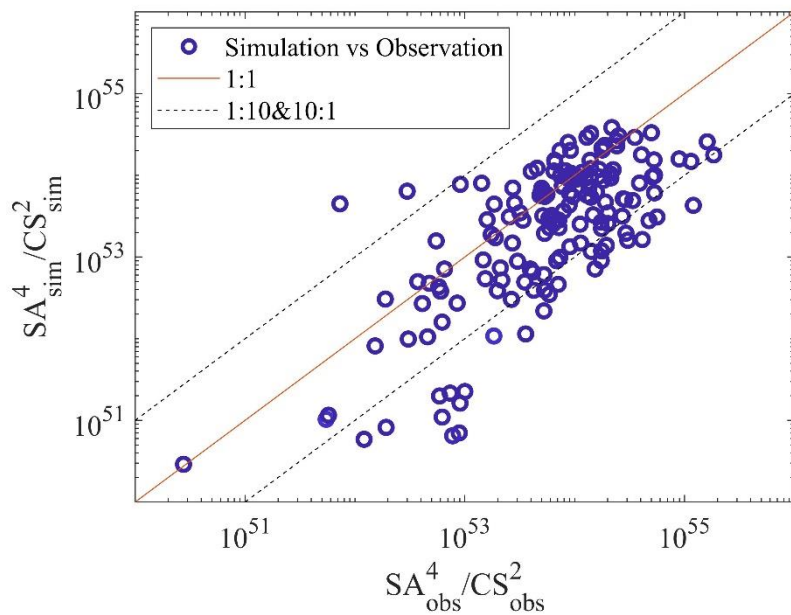

81

82 **Figure S6. Comparison of observed and simulated  $[SA]^4/CS^2$  to show the combined effect of simulated input parameters**  
83 **in DMA1.4\_Mech8.**

84

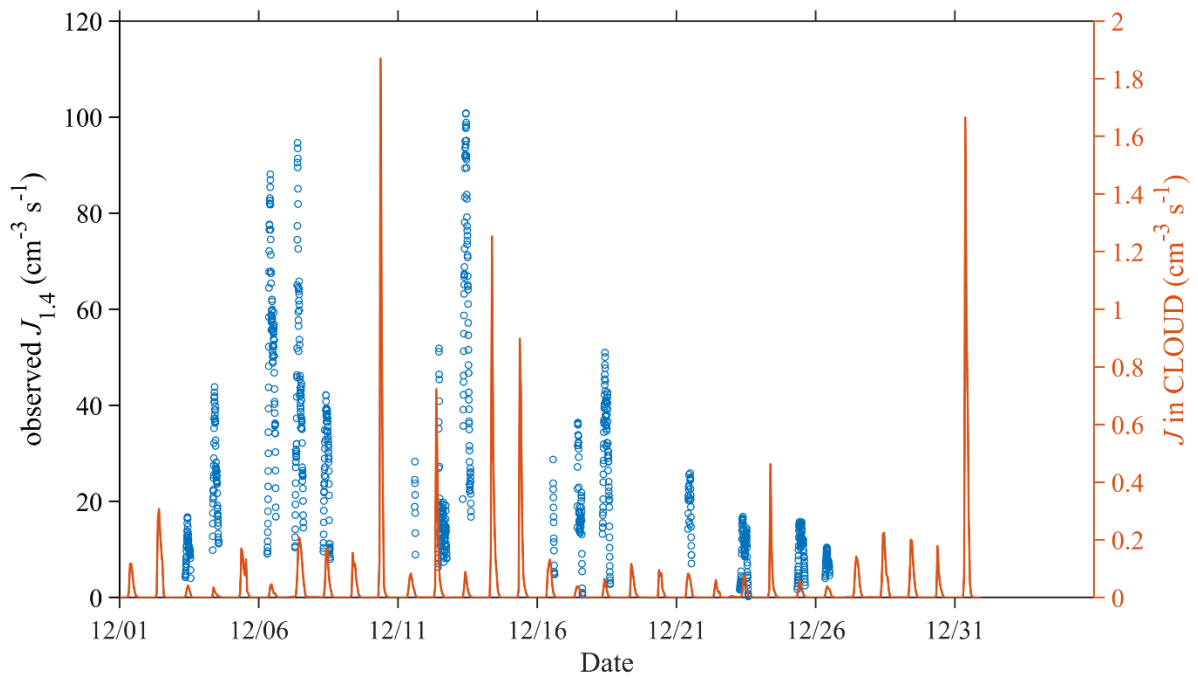

85

86 **Figure S7. Comparison of observed  $J_{1.4}$  and simulated nucleation rates from scenarios with parameterizations from**  
 87 **Dunne et al., 2016 (CLOUD).**

88

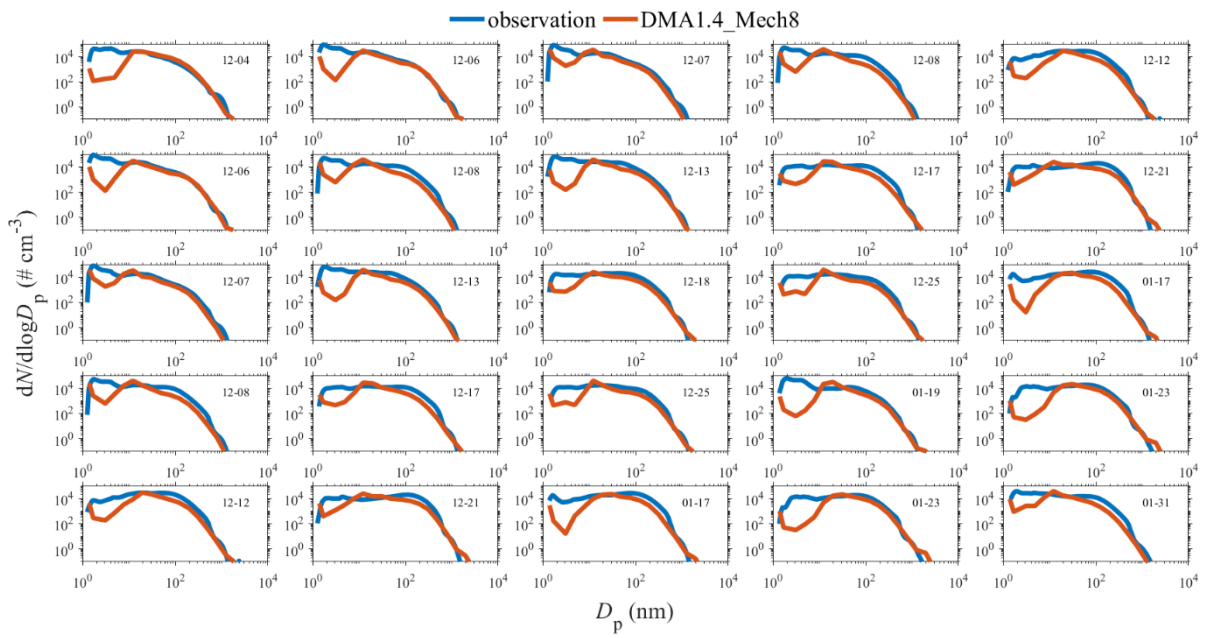

89

90 **Figure S8. Comparison of observed and simulated averaged particle number size distribution (from DMA1.4\_Mech8**  
 91 **scenario) for 25 NPF days.**

92

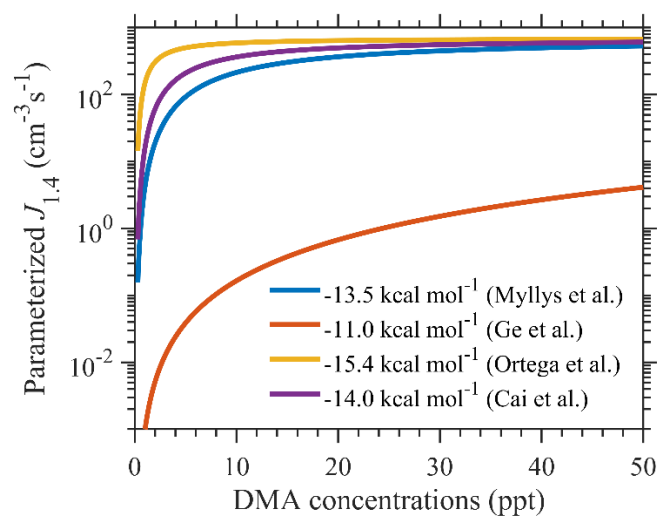

94  
95 **Figure S9.** Variation of parameterized  $J_{1.4}$  with DMA concentrations at 281 K with different  $\Delta G$  values applied of -  
96 15.40, -14.00, -13.54, and -11.02 kcal mol<sup>-1</sup>, respectively.

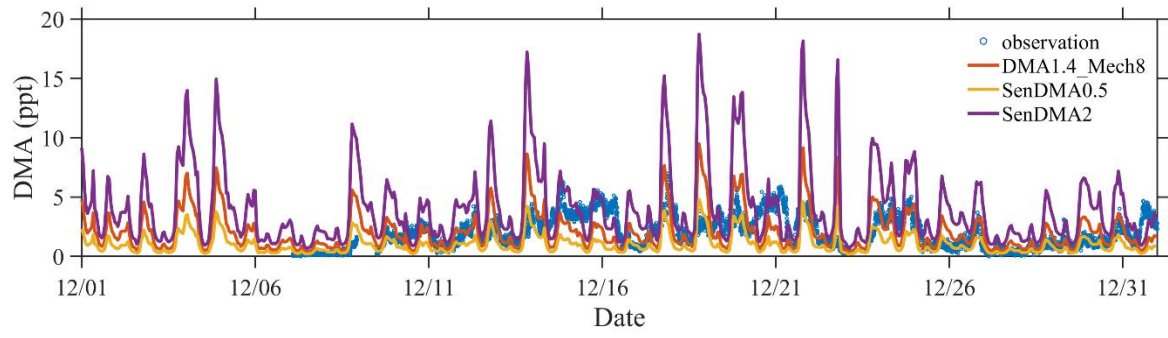

97  
98 **Figure S10. Comparison of observed and simulated DMA concentrations from sensitivity scenarios of halving**  
99 **(SenDMA0.5) and doubling (SenDMA2) the DMA emission and the original scenario (DMA1.4\_Mech8).**

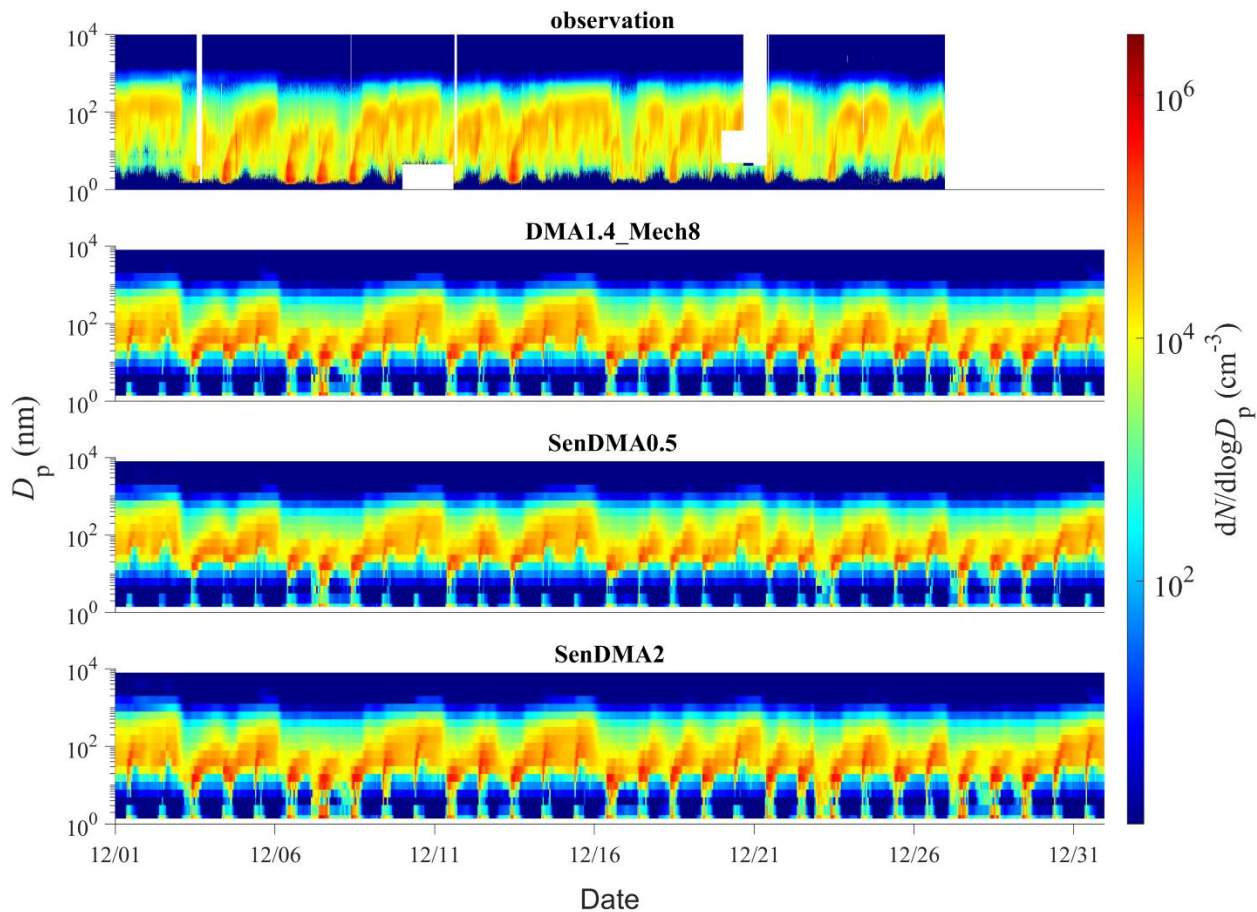

100

101 **Figure S11. Comparison of observed and simulated particle number size distribution from sensitivity scenarios of**  
 102 **halving (SenDMA0.5) and doubling (SenDMA2) the DMA emission and the original scenario (DMA1.4\_Mech8).**

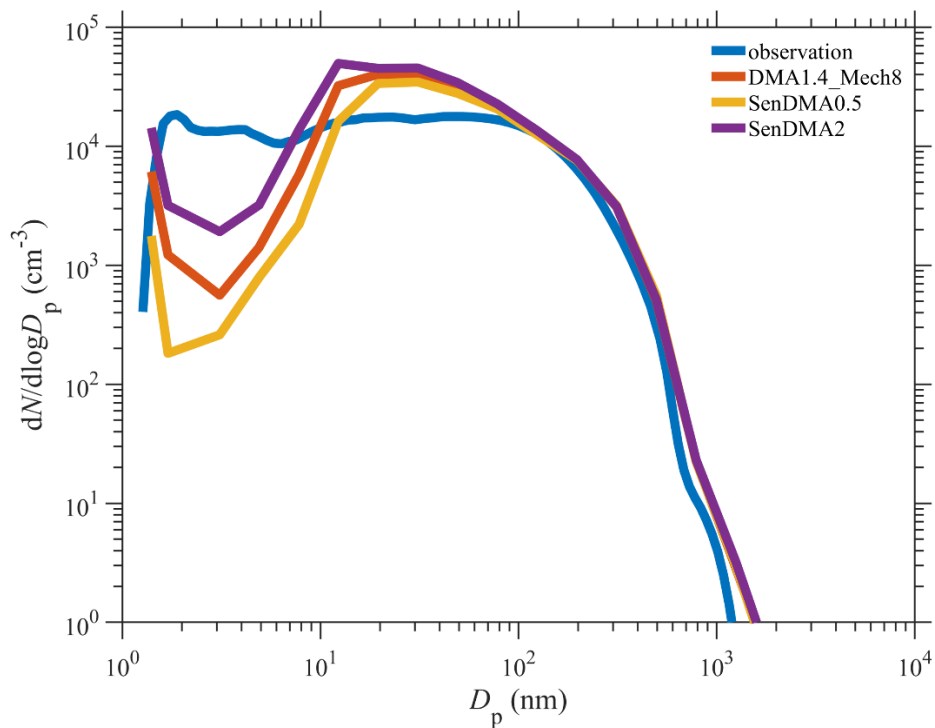

103  
 104 **Figure S12. Comparison of observed and simulated averaged particle number size distribution from sensitivity**  
 105 **scenarios of halving (SenDMA0.5) and doubling (SenDMA2) the DMA emission and the original scenario**  
 106 **(DMA1.4\_Mech8).**

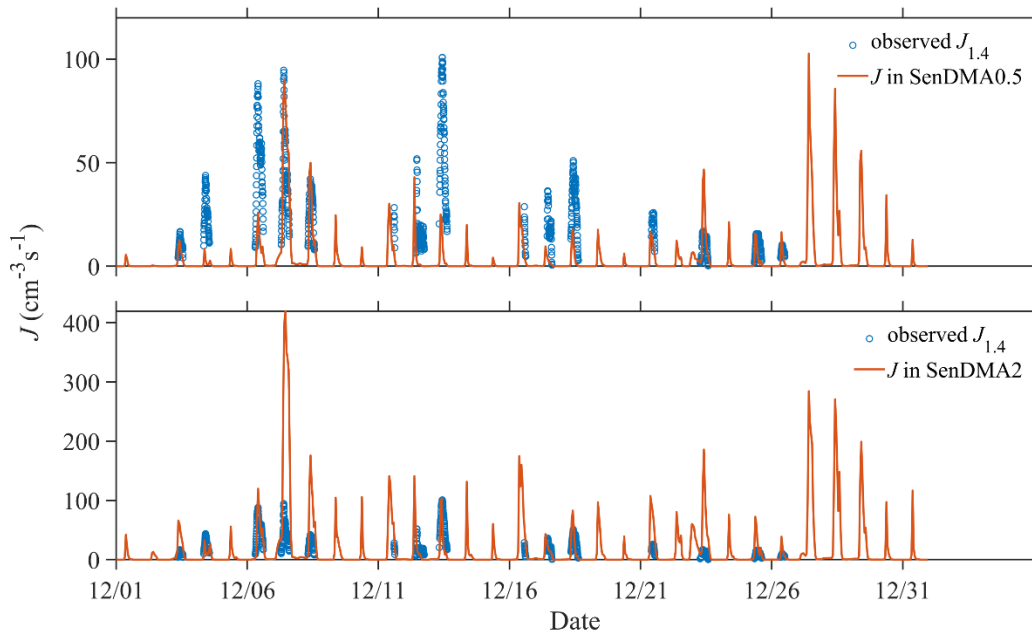

107  
 108 **Figure S13. Comparison of observed  $J_{1.4}$  and simulated nucleation rate from sensitivity scenarios of halving**  
 109 **(SenDMA0.5) (a) and doubling (SenDMA2) (b) the DMA emission.**



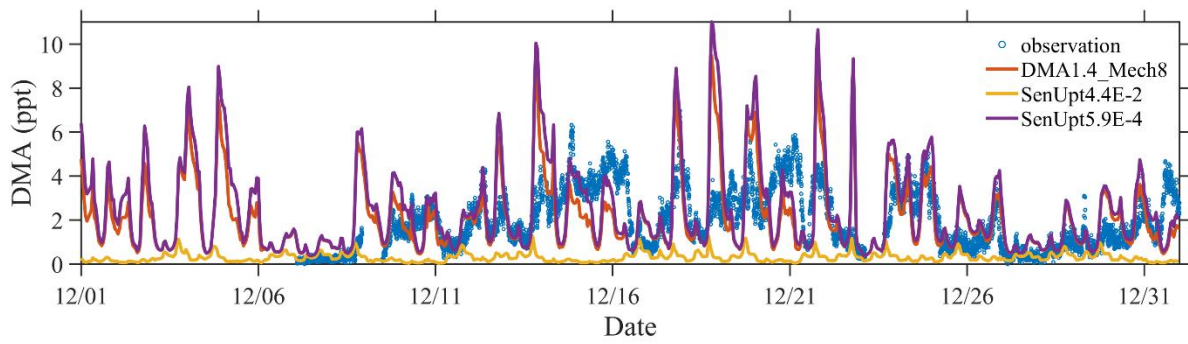

110

111 **Figure S14. Comparison of observed and simulated DMA concentrations from sensitivity scenarios using lowest**  
112 **(SenUpt5.9E-4) and highest (SenUpt4.4E-2) aerosol uptake coefficient of DMA and the original scenario**  
113 **(DMA1.4\_Mech8).**

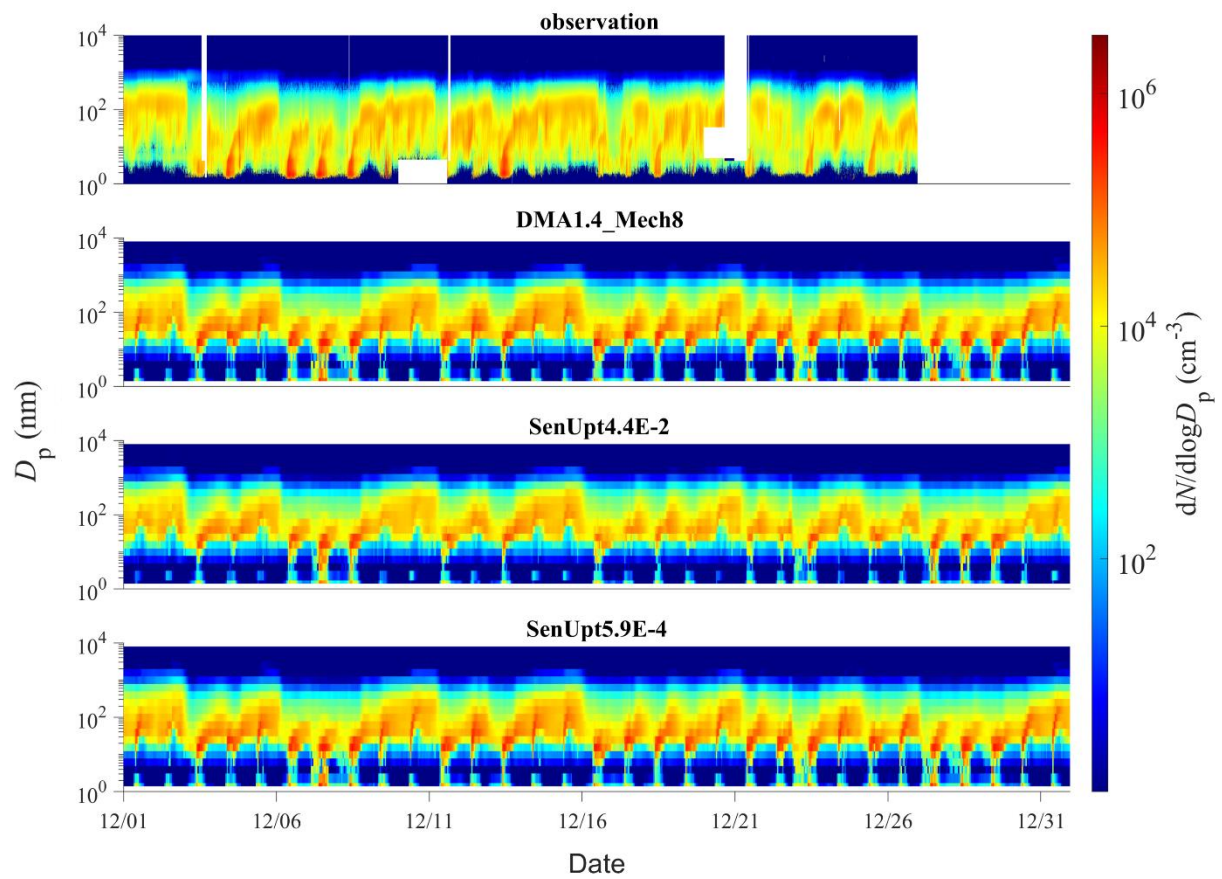

114  
 115 **Figure S15. Comparison of observed and simulated particle number size distribution from sensitivity scenarios using**  
 116 **lowest (SenUpt5.9E-4) and highest (SenUpt4.4E-2) aerosol uptake coefficient of DMA and the original scenario**  
 117 **(DMA1.4\_Mech8).**

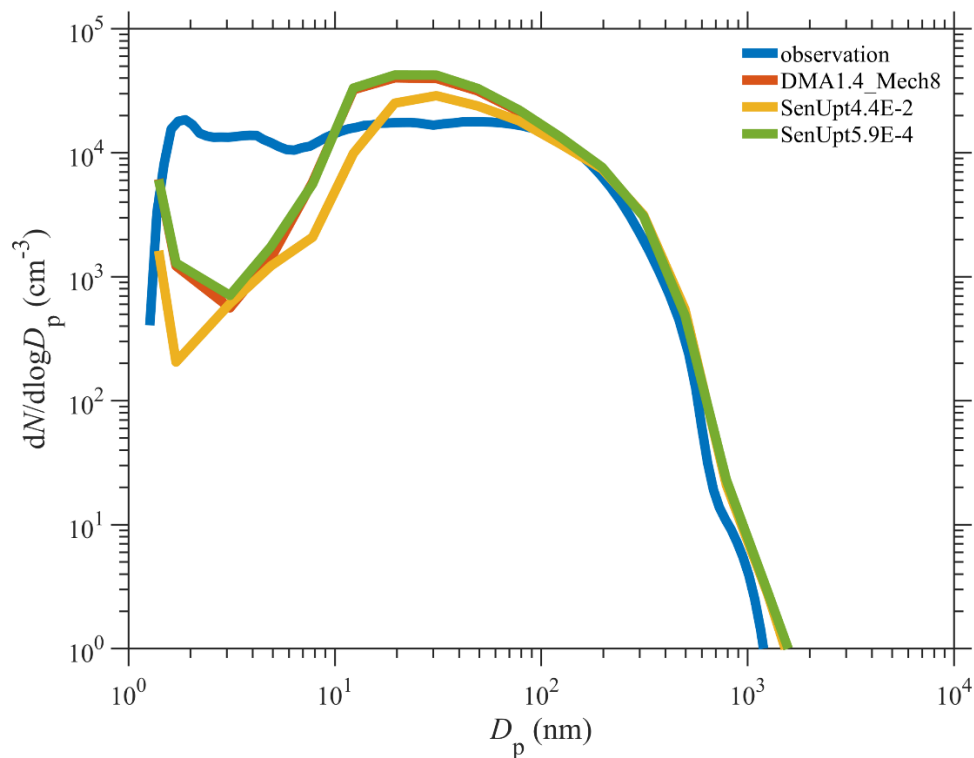

118  
 119 **Figure S16. Comparison of observed and simulated averaged particle number size distribution from sensitivity**  
 120 **scenarios using lowest (SenUpt5.9E-4) and highest (SenUpt4.4E-2) aerosol uptake coefficient of DMA and the original**  
 121 **scenario (DMA1.4\_Mech8).**

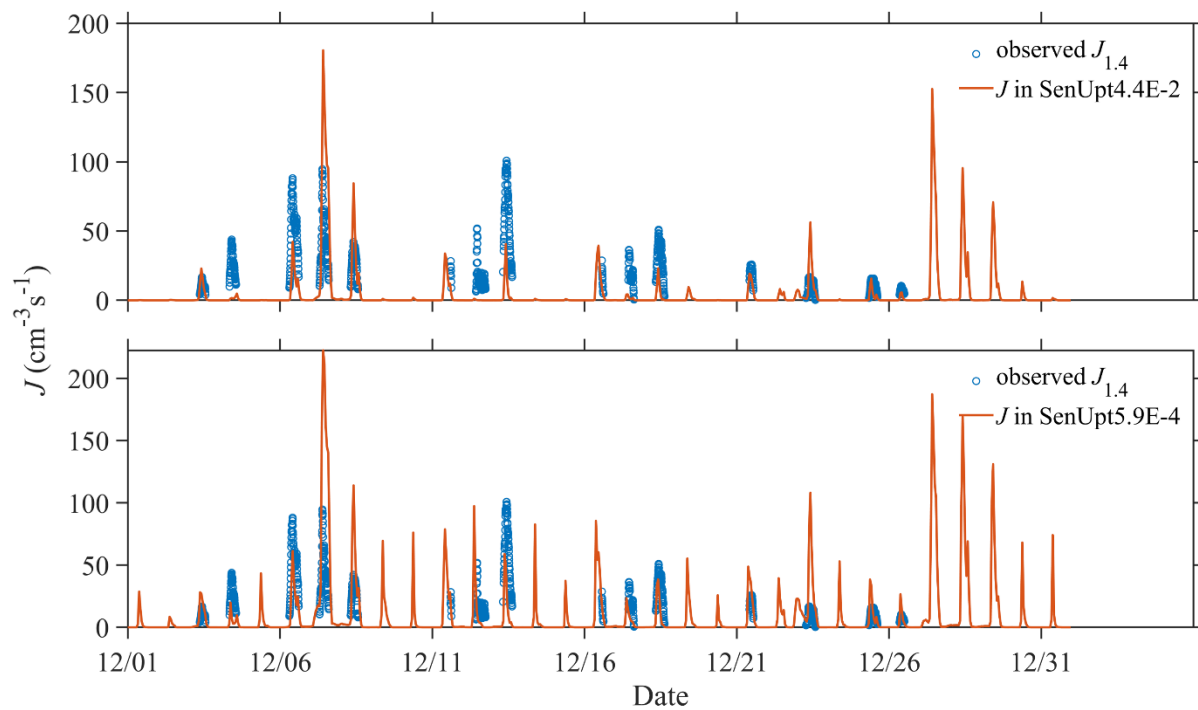

122  
 123 **Figure S17. Comparison of observed  $J_{1.4}$  and simulated nucleation rate from sensitivity scenarios using lowest**  
 124 **(SenUpt5.9E-4) (a) and highest (SenUpt4.4E-2) (b) aerosol uptake coefficient of DMA and the original scenario**  
 125 **(DMA1.4\_Mech8).**

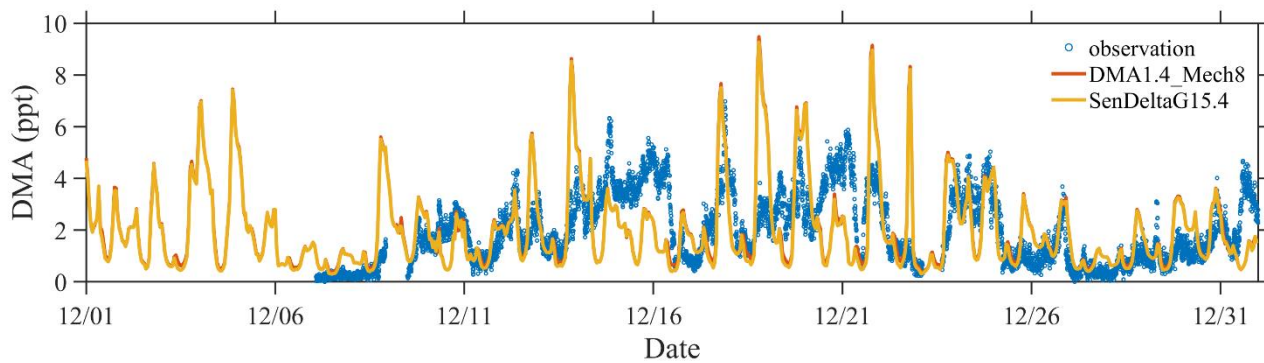

126  
127 **Figure S18. Comparison of observed and simulated DMA concentrations from sensitivity scenarios using  $\Delta G = -15.4$**   
128 **kcal mol<sup>-1</sup> (SenDeltaG15.4) and the original scenario (DMA1.4\_Mech8).**

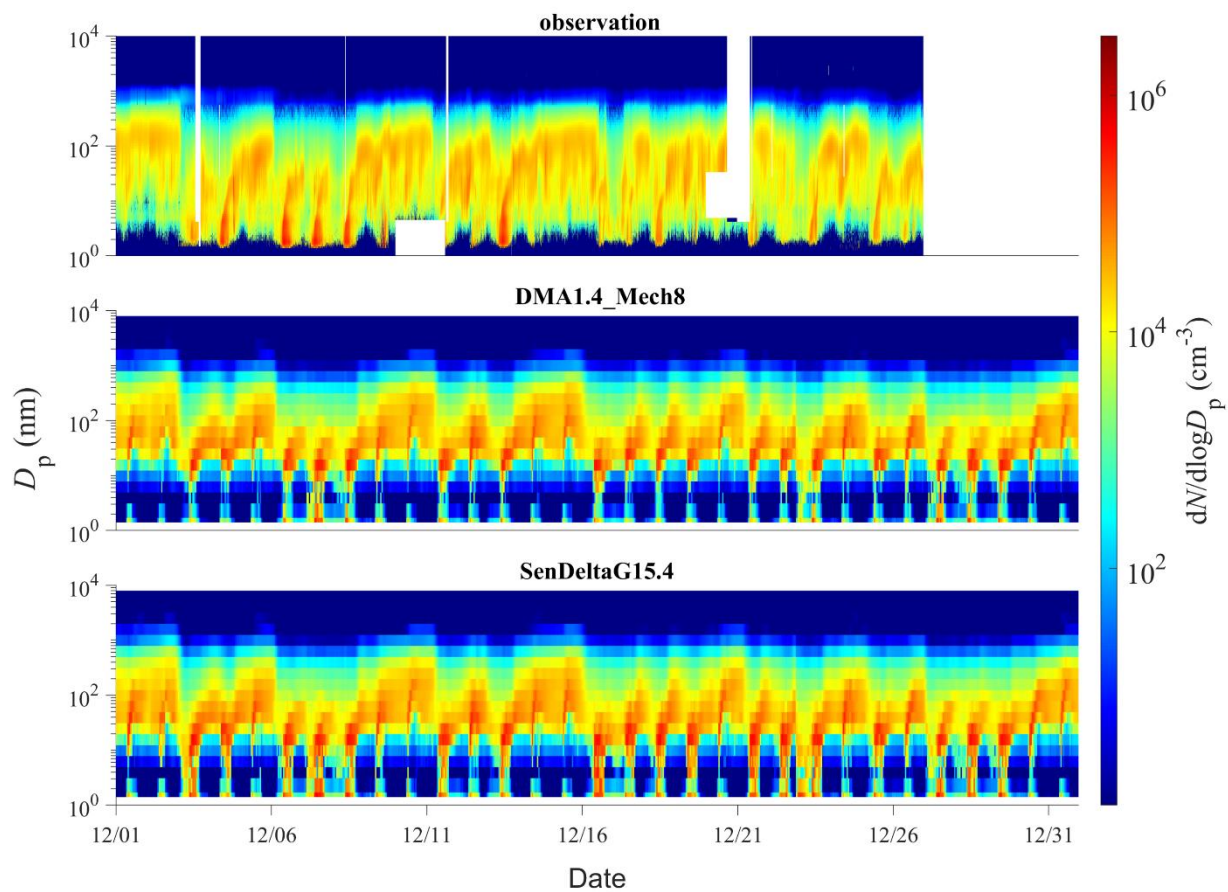

129  
 130 **Figure S19. Comparison of observed and simulated particle number size distribution from sensitivity scenario using**  
 131  **$\Delta G = -15.4 \text{ kcal mol}^{-1}$  (SenDeltaG15.4) and the original scenario (DMA1.4\_Mech8).**

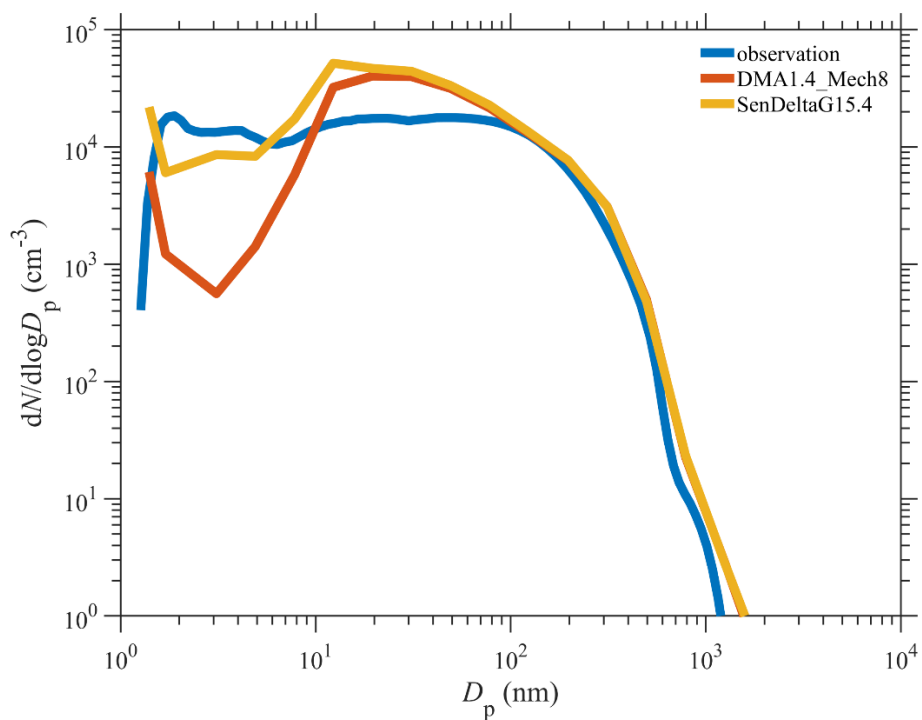

132  
133 **Figure S20. Comparison of observed and simulated averaged particle number size distribution from sensitivity**  
134 **scenarios using  $\Delta G = -15.4 \text{ kcal mol}^{-1}$  (SenDeltaG15.4) and the original scenario (DMA1.4\_Mech8).**

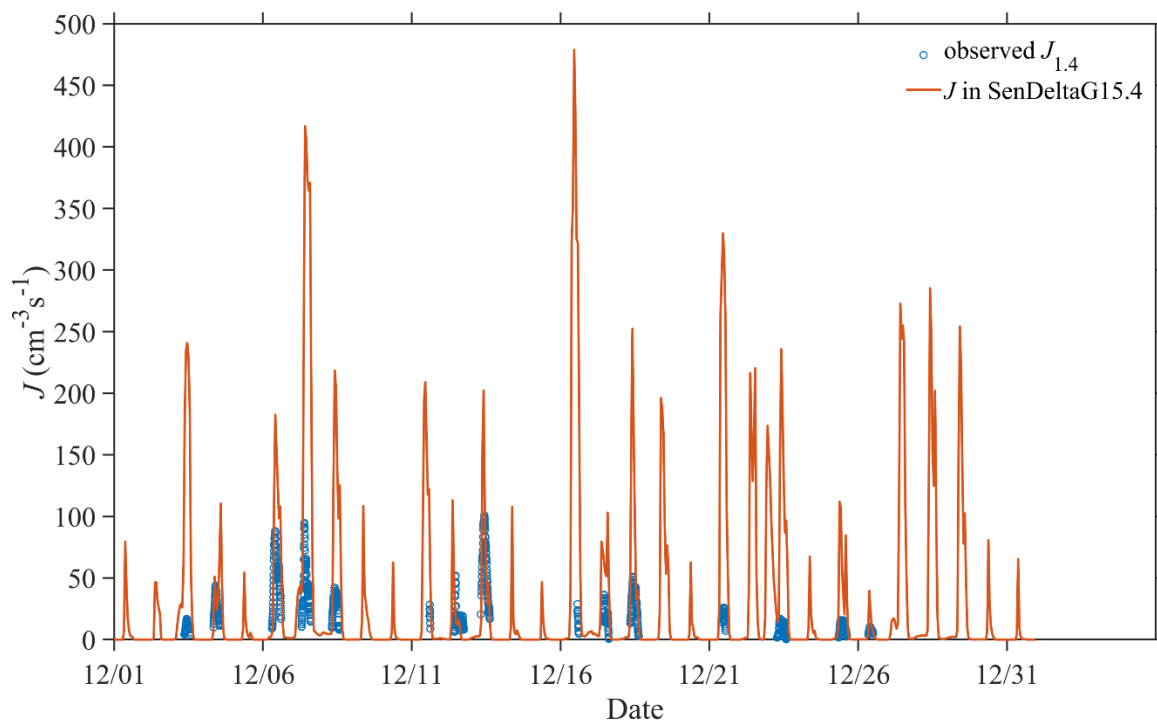

135  
136 **Figure S21. Comparison of observed  $J_{1.4}$  and simulated nucleation rates from sensitivity scenarios using  $\Delta G = -15.4$**   
137 **kcal mol<sup>-1</sup> (SenDeltaG15.4).**



138 **References:**

- 139 Cai, R. L., Yan, C., Yang, D. S., Yin, R. J., Lu, Y. Q., Deng, C. J., Fu, Y. Y., Ruan, J. X., Li, X. X., Kontkanen, J., Zhang,  
140 Q., Kangasluoma, J., Ma, Y., Hao, J. M., Worsnop, D. R., Bianchi, F., Paasonen, P., Kerminen, V. M., Liu, Y. C., Wang,  
141 L., Zheng, J., Kulmala, M., and Jiang, J. K.: Sulfuric acid-amine nucleation in urban Beijing, *Atmos Chem Phys*, 21,  
142 2457-2468, 2021.
- 143 Carl, S. A. and Crowley, J. N.: Sequential Two (Blue) Photon Absorption by NO<sub>2</sub> in the Presence of H<sub>2</sub> as a Source of OH in  
144 Pulsed Photolysis Kinetic Studies: Rate Constants for Reaction of OH with CH<sub>3</sub>NH<sub>2</sub>, (CH<sub>3</sub>)<sub>2</sub>NH, (CH<sub>3</sub>)<sub>3</sub>N, and C<sub>2</sub>H<sub>5</sub>NH<sub>2</sub>  
145 at 295 K, *The Journal of Physical Chemistry A*, 102, 8131-8141, 10.1021/jp9821937, 1998.
- 146 Chen, D., Shen, Y., Wang, J., Gao, Y., Gao, H., and Yao, X.: Mapping gaseous dimethylamine, trimethylamine, ammonia,  
147 and their particulate counterparts in marine atmospheres of China's marginal seas – Part 1: Differentiating marine  
148 emission from continental transport, *Atmos Chem Phys*, 21, 16413-16425, 10.5194/acp-21-16413-2021, 2021.
- 149 Qiu, C., Wang, L., Lal, V., Khalizov, A. F., and Zhang, R.: Heterogeneous reactions of alkylamines with ammonium sulfate  
150 and ammonium bisulfate, *Environ Sci Technol*, 45, 4748-4755, 10.1021/es1043112, 2011.
- 151 Sander, R.: Compilation of Henry's law constants (version 4.0) for water as solvent, *Atmos Chem Phys*, 15, 4399-4981,  
152 10.5194/acp-15-4399-2015, 2015.
- 153 Wang, L., Lal, V., Khalizov, A. F., and Zhang, R.: Heterogeneous Chemistry of Alkylamines with Sulfuric Acid:  
154 Implications for Atmospheric Formation of Alkylammonium Sulfates, *Environmental Science & Technology*, 44, 2461-  
155 2465, 10.1021/es9036868, 2010.
